# Supplementary material for: Optimization of NC-LSPR coupled MoS 2 phototransistors for high-performance broad-spectrum detection
Source: publisher site journal article supplement (doi:10.1515/nanoph-2024-0371), 2024-11-20
Supplement: Supplementary file 1 [file j_nanoph-2024-0371_suppl_001.docx]

# Supporting Information

**Optimization of NC-LSPR Coupled MoS2 Phototransistors for High-Performance Broad-Spectrum Detection**

Weichao Jiang, Yuheng Deng, Rui Su, Jingping Xu, and Lu Liu*

**Figure S1**. COMSOL simulation results of the AuNPs/3 nm Al2O3/MoS2 structure (**a**) with and (**b**) without Au electrode coverage.

**Figure S2**. The AFM images of AuNPs/Al2O3/MoS2 structure under different *T*AlO.

**Figure S3**. The photogenerated current (*I*ph) of *T*AlO = 3 nm device at different polarization angles.

**Table S1**. The specific data for detectivity and wavelength from the references in Figure 5d.

To align the model with the experimental geometry, we reconstructed the model in COMSOL, adding a 100 nm-thick Au electrode on the top of the MoS2, as shown in Figure S1, Figures S1a and S1b correspond to the COMSOL simulation results for the AuNPs/3 nm Al2O3/MoS2 structure with and without Au electrode coverage in the source-drain region and the channel region, respectively. A significant electric field enhancement is observed beneath the Au electrode in Figure S1a, which can be attributed to the enhanced LSPR effect in the NPOM system1. However, possibly due to the light shielding effect of the Au electrode and the vertical incident direction of the light with its polarization vector parallel to the Au film, the primary light absorption occurs from the horizontal mode of NPOM rather than the vertical dipole-dipole mode2. Consequently, the electric field enhancement from the LSPR effect in the uncovered channel region is approximately 50 times greater than that in the source/drain region.


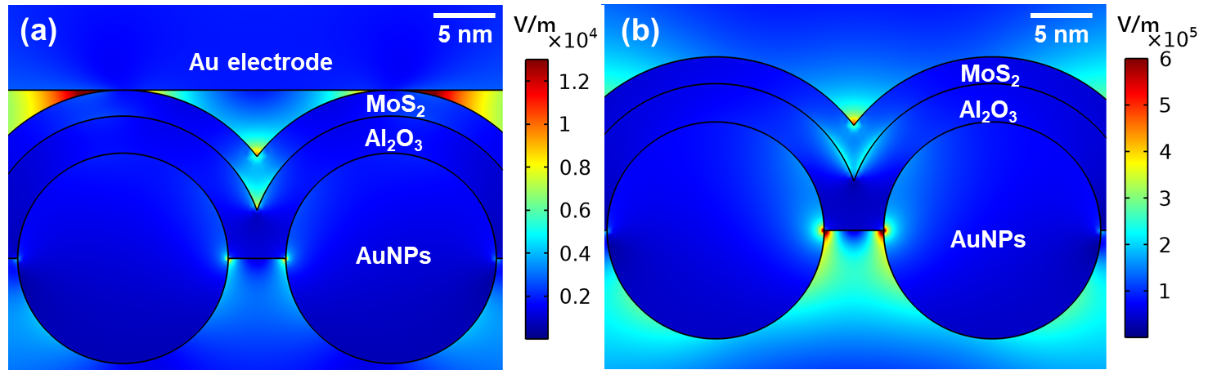


**Figure S1**. COMSOL simulation results of the AuNPs/3 nm Al2O3/MoS2 structure (**a**) with and (**b**) without Au electrode coverage.

The atomic force microscope (AFM) images of AuNPs/Al2O3/MoS2 structure with different *T*AlO`s have been given in Figure S2. It can be observed that the uneven surface of MoS2 gradually becomes smoother as *T*AlO increases, which is consistent with the Raman and PL analysis in the text, i.e., with the increase of *T*AlO, the tensile strain on MoS2 is weakened.


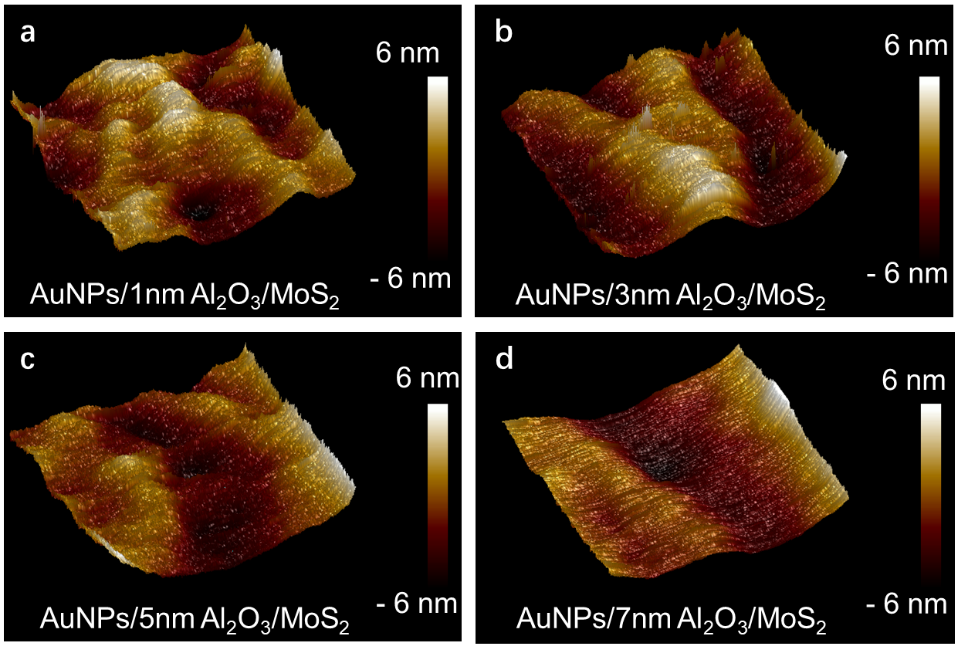


**Figure S2**. The AFM images of AuNPs/Al2O3/MoS2 structure with different *T*AlO`s of **a**) 1 nm, **b**) 3 nm, **c**) 5 nm and **d**) 7 nm, respectively.

The photogenerated current (*I*ph) of *T*AlO = 3 nm device at different polarization angles (*θ*) have been plotted in Figure S3. The photocurrent of the device presents an obvious polarization dependence of the incident light, and the photocurrent has a maximum value at polarization angles of 90° and 270°, and a minimum value at 0° and 180°, which is consistent with previously reported work3,4.


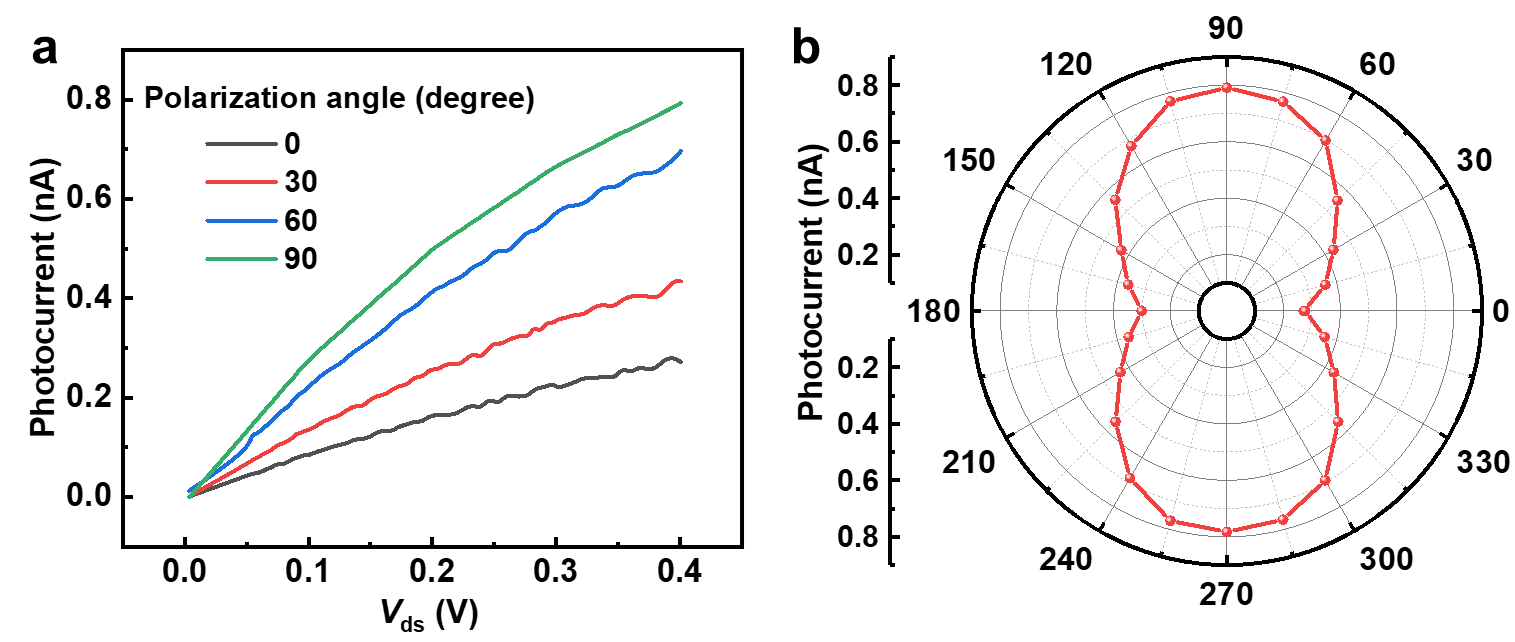


**Figure S3**. **a**) The *I*ph-*V*d curves and **b**) the *I*ph–*θ* polar plot for the device with *T*AlO = 3 nm.

**Table S1**. The specific data for detectivity and wavelength from the references in Figure 5d.

| References | Optimization strategy | Detectivity (Jones) | Wavelength  (nm) |
| --- | --- | --- | --- |
| This work | NC-LSPR coupled effect | 3.823×1014 | 528 |
| 1.097×1014 | 740 |
| Ref. 40 | Pristine phototransistors | 1.5×1010 | 532 |
| Ref. 41 | ~6×108 | 532 |
| Ref. 42 | 2×1010 | 633 |
| Ref. 43 | 7.7×1011 | 635 |
| Ref. 13 | LSPR enhancement | 9.89×109 | 532 |
| Ref. 14 | 4×1011 | 740 |
| Ref. 37 | 3.5×1011 | 520 |
| Ref. 38 | 6×1010 | 420 |
| Ref. 39 | 5.5×109 | 532 |
| Ref. 19 | NC enhancement | 1.33×1014 | 528 |
| Ref. 17 | 4.47×1014 | 637 |
| Ref. 10 | Charge transfer assistance | 1.29×1012 | 520 |
| Ref. 11 | 9×1011 | 650 |
| Ref. 12 | 2.0×107 | 681 |

**References:**

1. W. Chen, S. Zhang, M. Kang, W. Liu, Z. Ou, Y. Li, Y. Zhang, Z. Guan and H. Xu, “Probing the limits of plasmonic enhancement using a two-dimensional atomic crystal probe,” *Light Sci. Appl.*, vol. 7, no. 1, p. 56, 2018.
2. S. Mubeen, S. Zhang, N. Kim, S. Lee, S. Kramer, H. Xu and M. Moskovits, “Plasmonic Properties of Gold Nanoparticles Separated from a Gold Mirror by an Ultrathin Oxide,” *Nano Lett.* vol. 12, no. 4, p. 2088, 2021.
3. S. Chen, R. Cao, X. Chen, Q. Wu, Y. Zeng, S. Gao, Z. Guo, J. Zhao, M. Zhang and H. Zhang, “Anisotropic Plasmonic Nanostructure Induced Polarization Photoresponse for MoS2-Based Photodetector,” *Adv. Mater. Interfaces*, vol. 7, no. 9, p. 1902179, 2020.
4. Y. Tan, R. He, C. Cheng, D. Wang, Y. Chen and F. Chen, “Polarization-dependent optical absorption of MoS2 for refractive index sensing,” *Sci. Rep.*, vol. 4, no. 1, p. 7523, 2014.
